# Supplementary material for: Ensemble modelling enables prediction of suitable habitat of critically endangered White bellied Heron in Bhutan (Ardea insignis) under climate change
Source: Research Square preprint supplement (doi:10.21203/rs.3.rs-7271172/v1), 2025-09-25
Supplement: Supplementary file 1 [file 32c4513015a75332903c0f48.docx]

Supplementary table

Table 1: Cleaned species occurrence records

| **SL.NO** | **Latitude** | **Longitude** | **Presence** |
| --- | --- | --- | --- |
| 1 | 27.56946 | 89.874 | 1 |
| 2 | 27.593653 | 89.87074 | 1 |
| 3 | 27.586807 | 89.87366 | 1 |
| 4 | 27.618855 | 89.870224 | 1 |
| 5 | 27.581911 | 89.86385 | 1 |
| 6 | 27.5117 | 89.79517 | 1 |
| 7 | 27.610235 | 89.87134 | 1 |
| 8 | 27.50664 | 89.75301 | 1 |
| 9 | 27.641422 | 89.86413 | 1 |
| 10 | 27.60657 | 89.87453 | 1 |
| 11 | 27.457669 | 90.530419 | 1 |
| 12 | 27.59837 | 89.864731 | 1 |
| 13 | 27.011839 | 90.651133 | 1 |
| 14 | 27.026206 | 90.045736 | 1 |
| 15 | 27.241504 | 90.56413 | 1 |
| 16 | 27.481094 | 89.89687 | 1 |
| 17 | 27.05903 | 90.07103 | 1 |
| 18 | 27.17004 | 90.6588 | 1 |
| 19 | 27.510277 | 89.88805 | 1 |
| 20 | 27.400728 | 89.42201 | 1 |
| 21 | 27.46527 | 89.8987 | 1 |
| 22 | 27.344217 | 90.73513 | 1 |
| 23 | 26.863281 | 90.26818 | 1 |
| 24 | 27.124487 | 90.07279 | 1 |
| 25 | 27.578863 | 89.86362 | 1 |
| 26 | 27.472778 | 89.89506 | 1 |
| 27 | 27.115559 | 90.713394 | 1 |
| 28 | 27.209717 | 90.06815 | 1 |
| 29 | 27.552046 | 89.87046 | 1 |
| 30 | 27.502523 | 89.89032 | 1 |
| 31 | 27.469744 | 90.17115 | 1 |
| 32 | 27.498667 | 89.89324 | 1 |
| 33 | 27.482513 | 89.90468 | 1 |
| 34 | 27.52558 | 89.88314 | 1 |
| 35 | 27.097319 | 90.75606 | 1 |
| 36 | 27.55039 | 89.86938 | 1 |
| 37 | 27.146366 | 90.690765 | 1 |
| 38 | 26.778088 | 89.70308 | 1 |
| 39 | 27.03366 | 90.07583 | 1 |
| 40 | 27.172827 | 90.698685 | 1 |
| 41 | 27.41408 | 89.41948 | 1 |
| 42 | 27.129095 | 90.70434 | 1 |
| 43 | 26.773556 | 90.13338 | 1 |
| 44 | 27.4705 | 89.894875 | 1 |
| 45 | 27.509968 | 89.88697 | 1 |
| 46 | 27.23005 | 90.06363 | 1 |
| 47 | 27.497492 | 90.51842 | 1 |
| 48 | 27.141674 | 90.685814 | 1 |
| 49 | 27.499012 | 90.028366 | 1 |
| 50 | 27.113369 | 90.72839 | 1 |
| 51 | 27.033152 | 90.07763 | 1 |
| 52 | 27.11041 | 90.0729 | 1 |
| 53 | 27.02699 | 90.07496 | 1 |
| 54 | 27.823 | 91.444 | 1 |
| 55 | 27.115774 | 90.73776 | 1 |
| 56 | 27.099358 | 90.703674 | 1 |
| 57 | 27.05391 | 90.07675 | 1 |
| 58 | 27.018068 | 90.10177 | 1 |
| 59 | 27.57729 | 89.87108 | 1 |
| 60 | 26.850319 | 90.9604 | 1 |
| 61 | 27.50142 | 90.50621 | 1 |
| 62 | 27.120335 | 90.71727 | 1 |
| 63 | 27.443157 | 89.812976 | 1 |
| 64 | 27.489207 | 89.978039 | 1 |
| 65 | 27.15939 | 90.93918 | 1 |
| 66 | 27.411066 | 90.40188 | 1 |
| 67 | 27.030525 | 90.71527 | 1 |
| 68 | 27.52635 | 90.103935 | 1 |
| 69 | 27.692373 | 89.7716 | 1 |
| 70 | 27.262695 | 90.03709 | 1 |
| 71 | 27.140076 | 90.69932 | 1 |
| 72 | 27.682188 | 89.77336 | 1 |
| 73 | 27.552253 | 89.91243 | 1 |
| 74 | 27.516184 | 89.817785 | 1 |
| 75 | 27.067208 | 90.056579 | 1 |
| 76 | 27.286312 | 91.082153 | 1 |
| 77 | 27.150353 | 90.679264 | 1 |
| 78 | 27.151394 | 90.641525 | 1 |
| 79 | 27.621035 | 89.86881 | 1 |
| 80 | 26.915344 | 90.04087 | 1 |
| 81 | 27.013557 | 90.06929 | 1 |
| 82 | 26.87148 | 89.6 | 1 |
| 83 | 26.819551 | 90.021736 | 1 |
| 84 | 27.050404 | 90.09869 | 1 |
| 85 | 27.609945 | 89.86941 | 1 |
| 86 | 27.083769 | 90.0739 | 1 |
| 87 | 27.054373 | 90.075516 | 1 |
| 88 | 27.120436 | 90.07156 | 1 |
| 89 | 27.070032 | 90.09863 | 1 |
| 90 | 27.536367 | 89.8671 | 1 |
| 91 | 27.072039 | 90.07266 | 1 |
| 92 | 27.103329 | 90.09955 | 1 |
| 93 | 27.134315 | 90.068085 | 1 |
| 94 | 27.150183 | 90.780813 | 1 |
| 95 | 27.690372 | 89.887932 | 1 |
| 96 | 27.222946 | 90.615524 | 1 |
| 97 | 27.179283 | 90.068489 | 1 |
| 98 | 26.869249 | 90.48661 | 1 |
| 99 | 27.486795 | 89.892799 | 1 |
| 100 | 27.032207 | 90.186966 | 1 |
| 101 | 27.017611 | 90.039658 | 1 |
| 102 | 27.627394 | 89.867744 | 1 |
| 103 | 27.106878 | 90.71943 | 1 |
| 104 | 27.554192 | 89.87512 | 1 |
| 105 | 27.535984 | 89.872086 | 1 |
| 106 | 27.094318 | 90.76329 | 1 |
| 107 | 27.453436 | 89.90442 | 1 |
| 108 | 27.48901 | 89.75629 | 1 |
| 109 | 27.274632 | 90.02973 | 1 |
| 110 | 27.563477 | 89.81152 | 1 |
| 111 | 27.52488 | 89.873 | 1 |
| 112 | 27.489944 | 89.748955 | 1 |
| 113 | 27.157207 | 90.695404 | 1 |
| 114 | 27.189135 | 90.64812 | 1 |
| 115 | 27.09414 | 90.76027 | 1 |
| 116 | 27.489132 | 89.74274 | 1 |
| 117 | 27.100756 | 90.75102 | 1 |
| 118 | 27.524397 | 89.80312 | 1 |
| 119 | 27.263626 | 90.789344 | 1 |
| 120 | 27.148 | 90.637 | 1 |
| 121 | 27.60038 | 89.85471 | 1 |
| 122 | 27.592077 | 89.879776 | 1 |
| 123 | 27.133156 | 90.70421 | 1 |
| 124 | 27.596563 | 89.85524 | 1 |
| 125 | 27.266178 | 90.03796 | 1 |
| 126 | 27.156597 | 90.06962 | 1 |
| 127 | 27.604834 | 89.84799 | 1 |
| 128 | 27.211487 | 90.66204 | 1 |
| 129 | 27.177814 | 90.69182 | 1 |
| 130 | 27.08672 | 90.64265 | 1 |
| 131 | 27.16567 | 90.66431 | 1 |
| 132 | 27.607412 | 89.867516 | 1 |
| 133 | 26.846916 | 90.20879 | 1 |
| 134 | 26.971172 | 90.06878 | 1 |
| 135 | 26.946747 | 90.202965 | 1 |
| 136 | 27.01022 | 90.07232 | 1 |
| 137 | 27.551746 | 89.678472 | 1 |
| 138 | 27.009505 | 90.144929 | 1 |
| 139 | 27.399493 | 90.622442 | 1 |
| 140 | 27.767562 | 89.649435 | 1 |
| 141 | 27.708815 | 89.975596 | 1 |
| 142 | 27.747397 | 89.810443 | 1 |
| 143 | 27.818895 | 89.72841 | 1 |
| 144 | 27.13357 | 90.695305 | 1 |
| 145 | 26.9724 | 90.13585 | 1 |
| 146 | 27.006231 | 90.12403 | 1 |
| 147 | 27.339655 | 89.920975 | 1 |
| 148 | 27.090492 | 90.0722 | 1 |
| 149 | 27.093975 | 90.08291 | 1 |
| 150 | 27.000711 | 90.069565 | 1 |
| 151 | 27.49903 | 89.877075 | 1 |
| 152 | 27.047009 | 90.07846 | 1 |
| 153 | 27.622905 | 89.805444 | 1 |
| 154 | 27.373672 | 90.97881 | 1 |
| 155 | 27.369862 | 90.53357 | 1 |
| 156 | 27.458626 | 89.9058 | 1 |
| 157 | 27.045983 | 90.016384 | 1 |
